# Supplementary material
Source: PubMed Central journal article supplement (PMC6906267)
Supplement: NIHMS1035825-supplement-Supp_info1.pdf [file NIHMS1035825-supplement-Supp_info1.pdf]

# Supplementary fig. 1

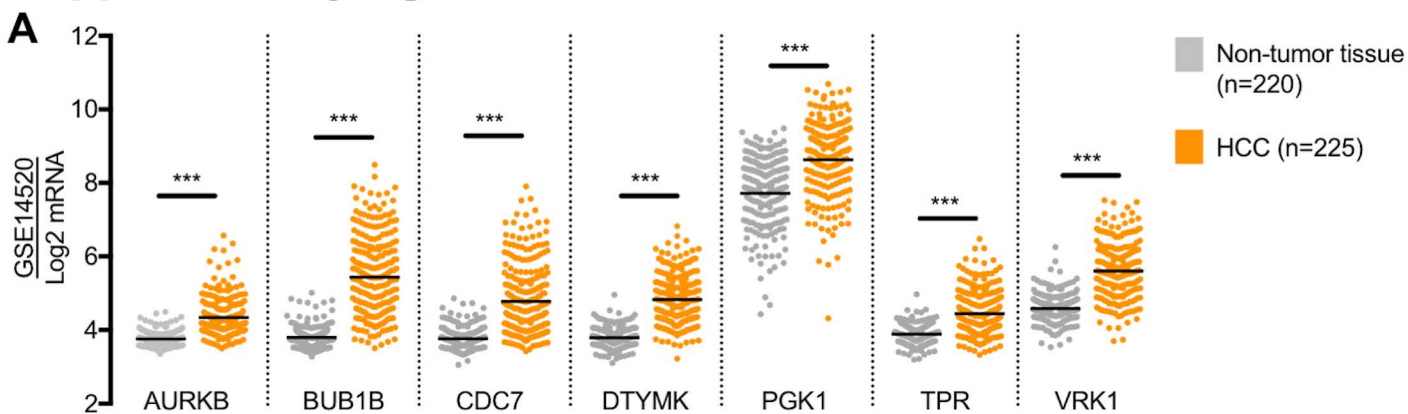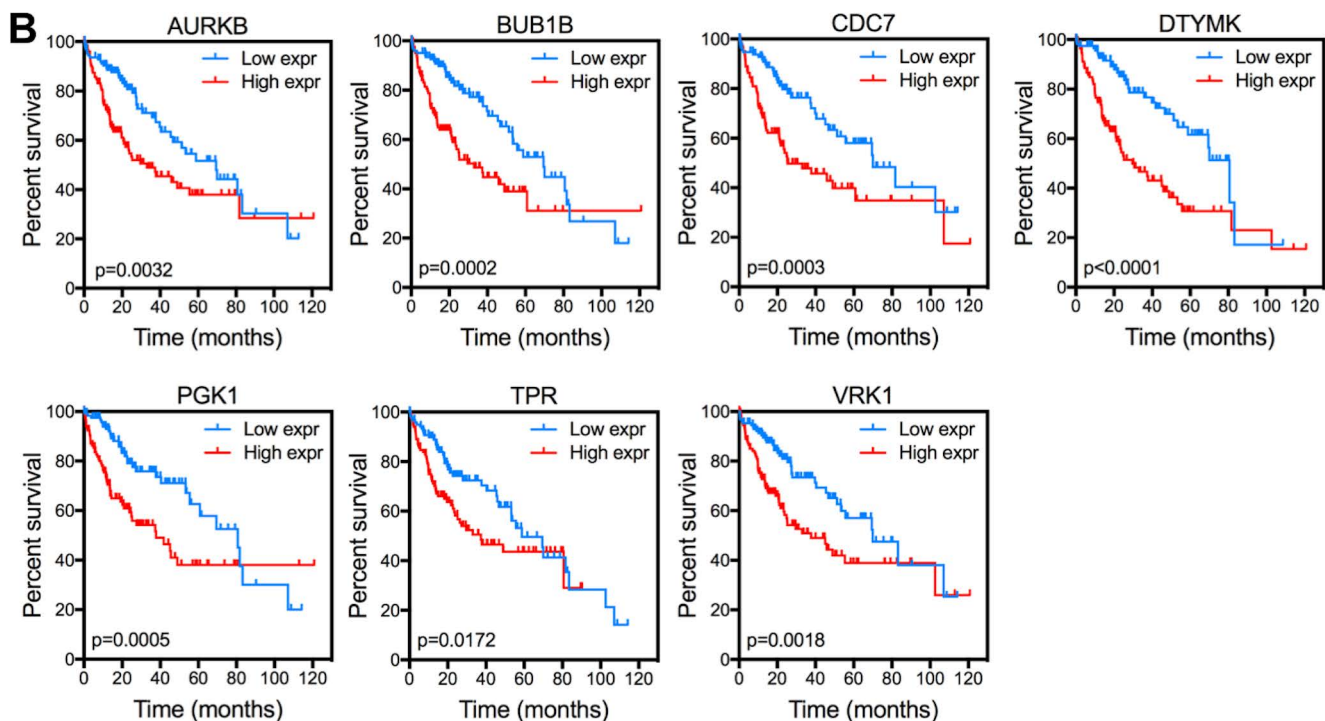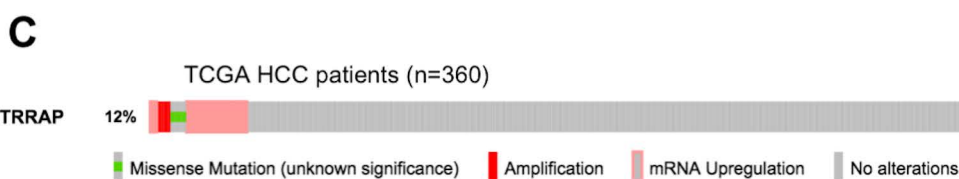

| Sample ID       | Mutation    |
|-----------------|-------------|
| TCGA-DD-A4NV-01 | V2970M      |
| TCGA-CC-A7IF-01 | Q1940L      |
| TCGA-DD-AAAC-01 | H1262R      |
| TCGA-BC-A10U-01 | D408G       |
| TCGA-WQ-A9G7-01 | R1144C      |
| TCGA-DD-A39X-01 | H634Y       |
| TCGA-DD-A3A0-01 | Q2662R      |
| TCGA-DD-A3A0-01 | E2803Nfs*29 |
| TCGA-EP-A2KB-01 | R1544L      |

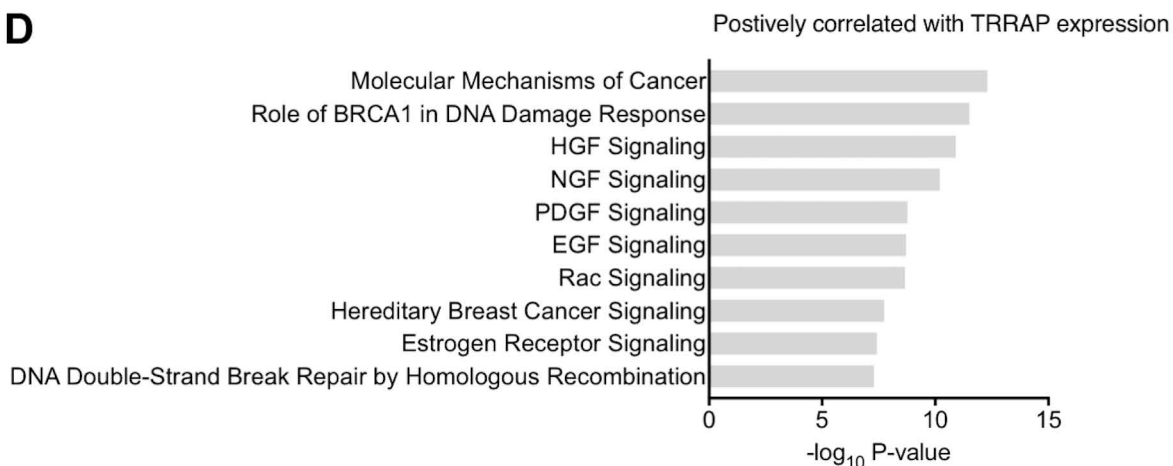

# Supplementary fig. 2

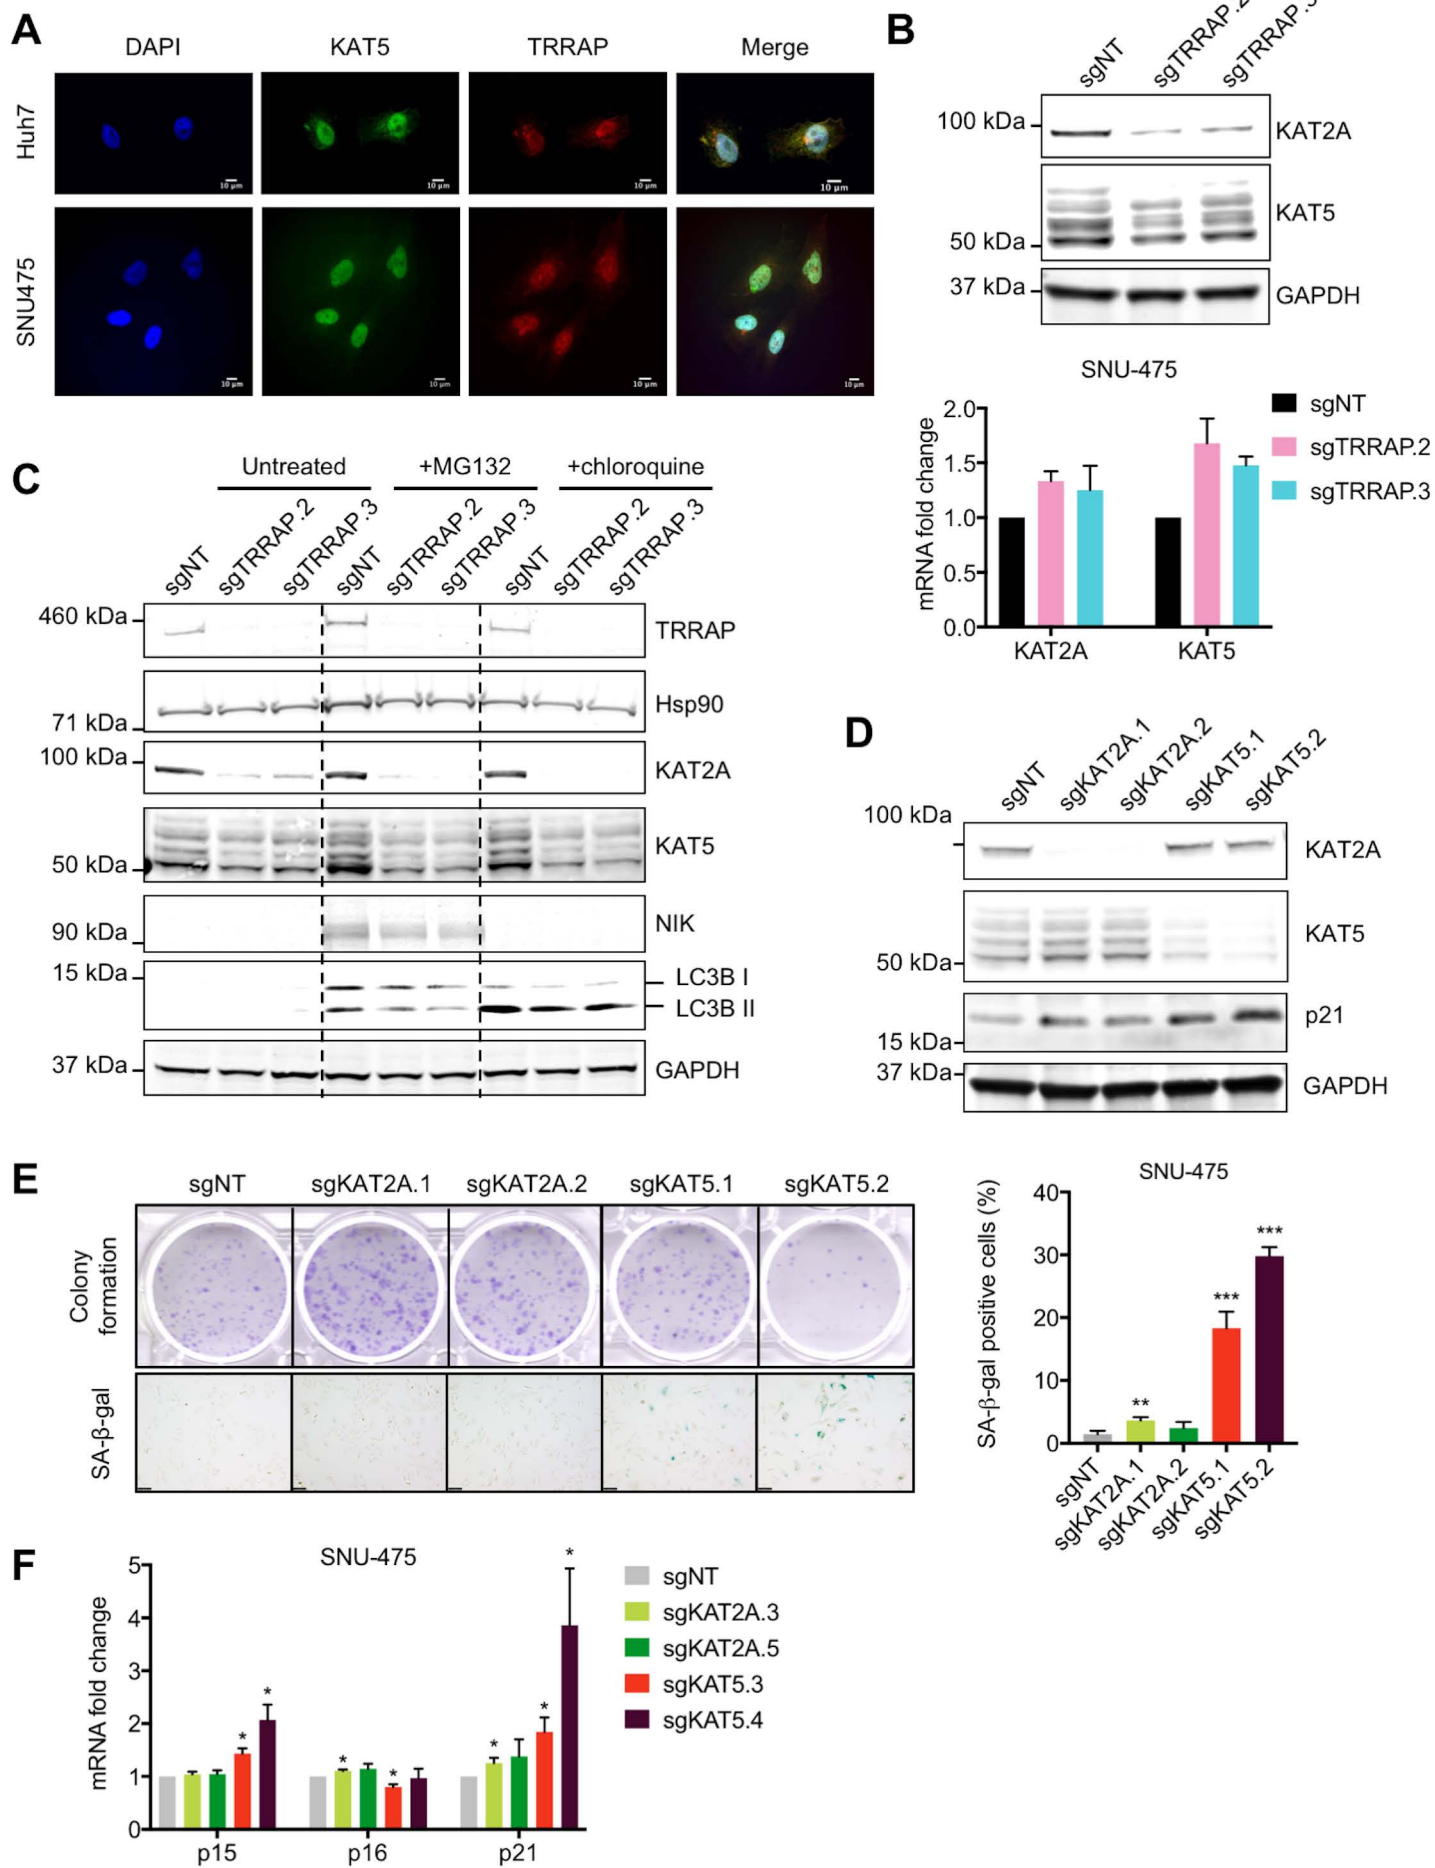

# Supplementary fig. 3

**A**

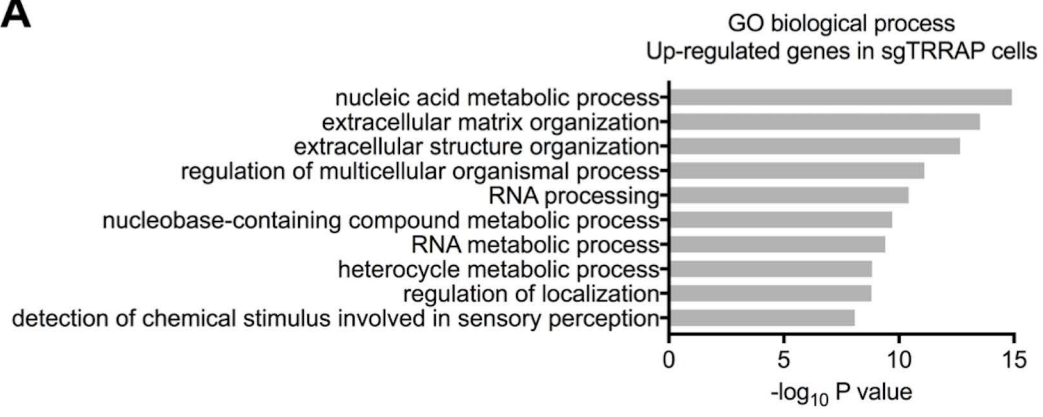

**B**

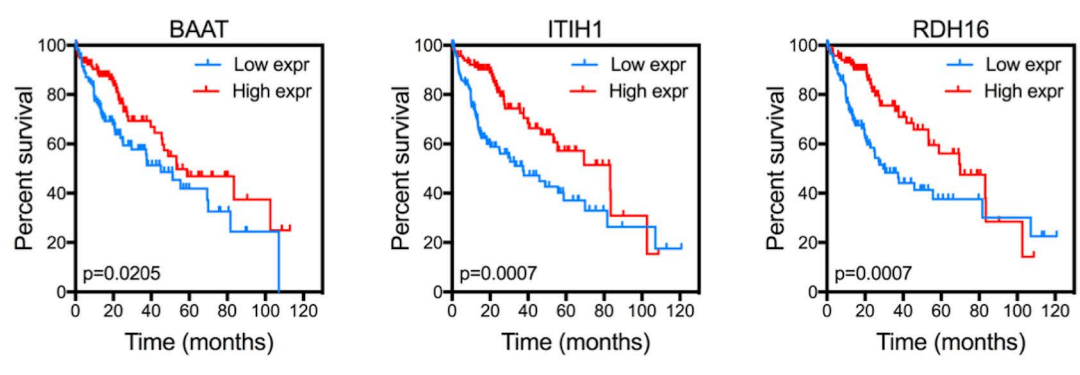

**C**

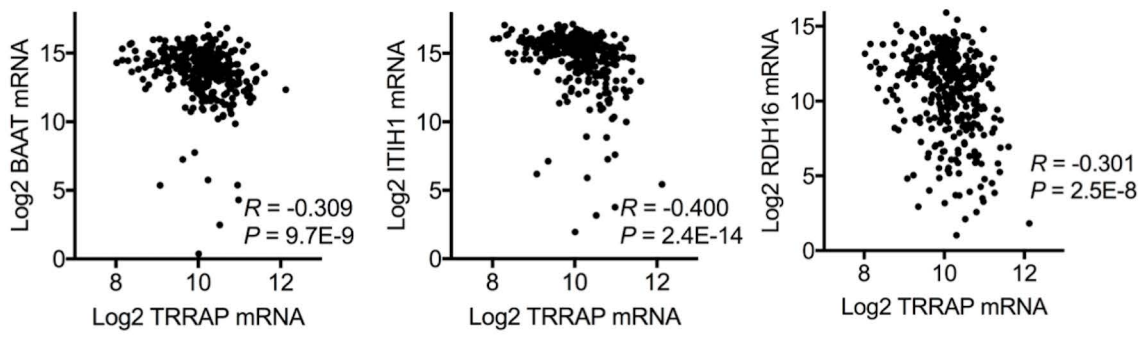



# Supplemental fig. 4

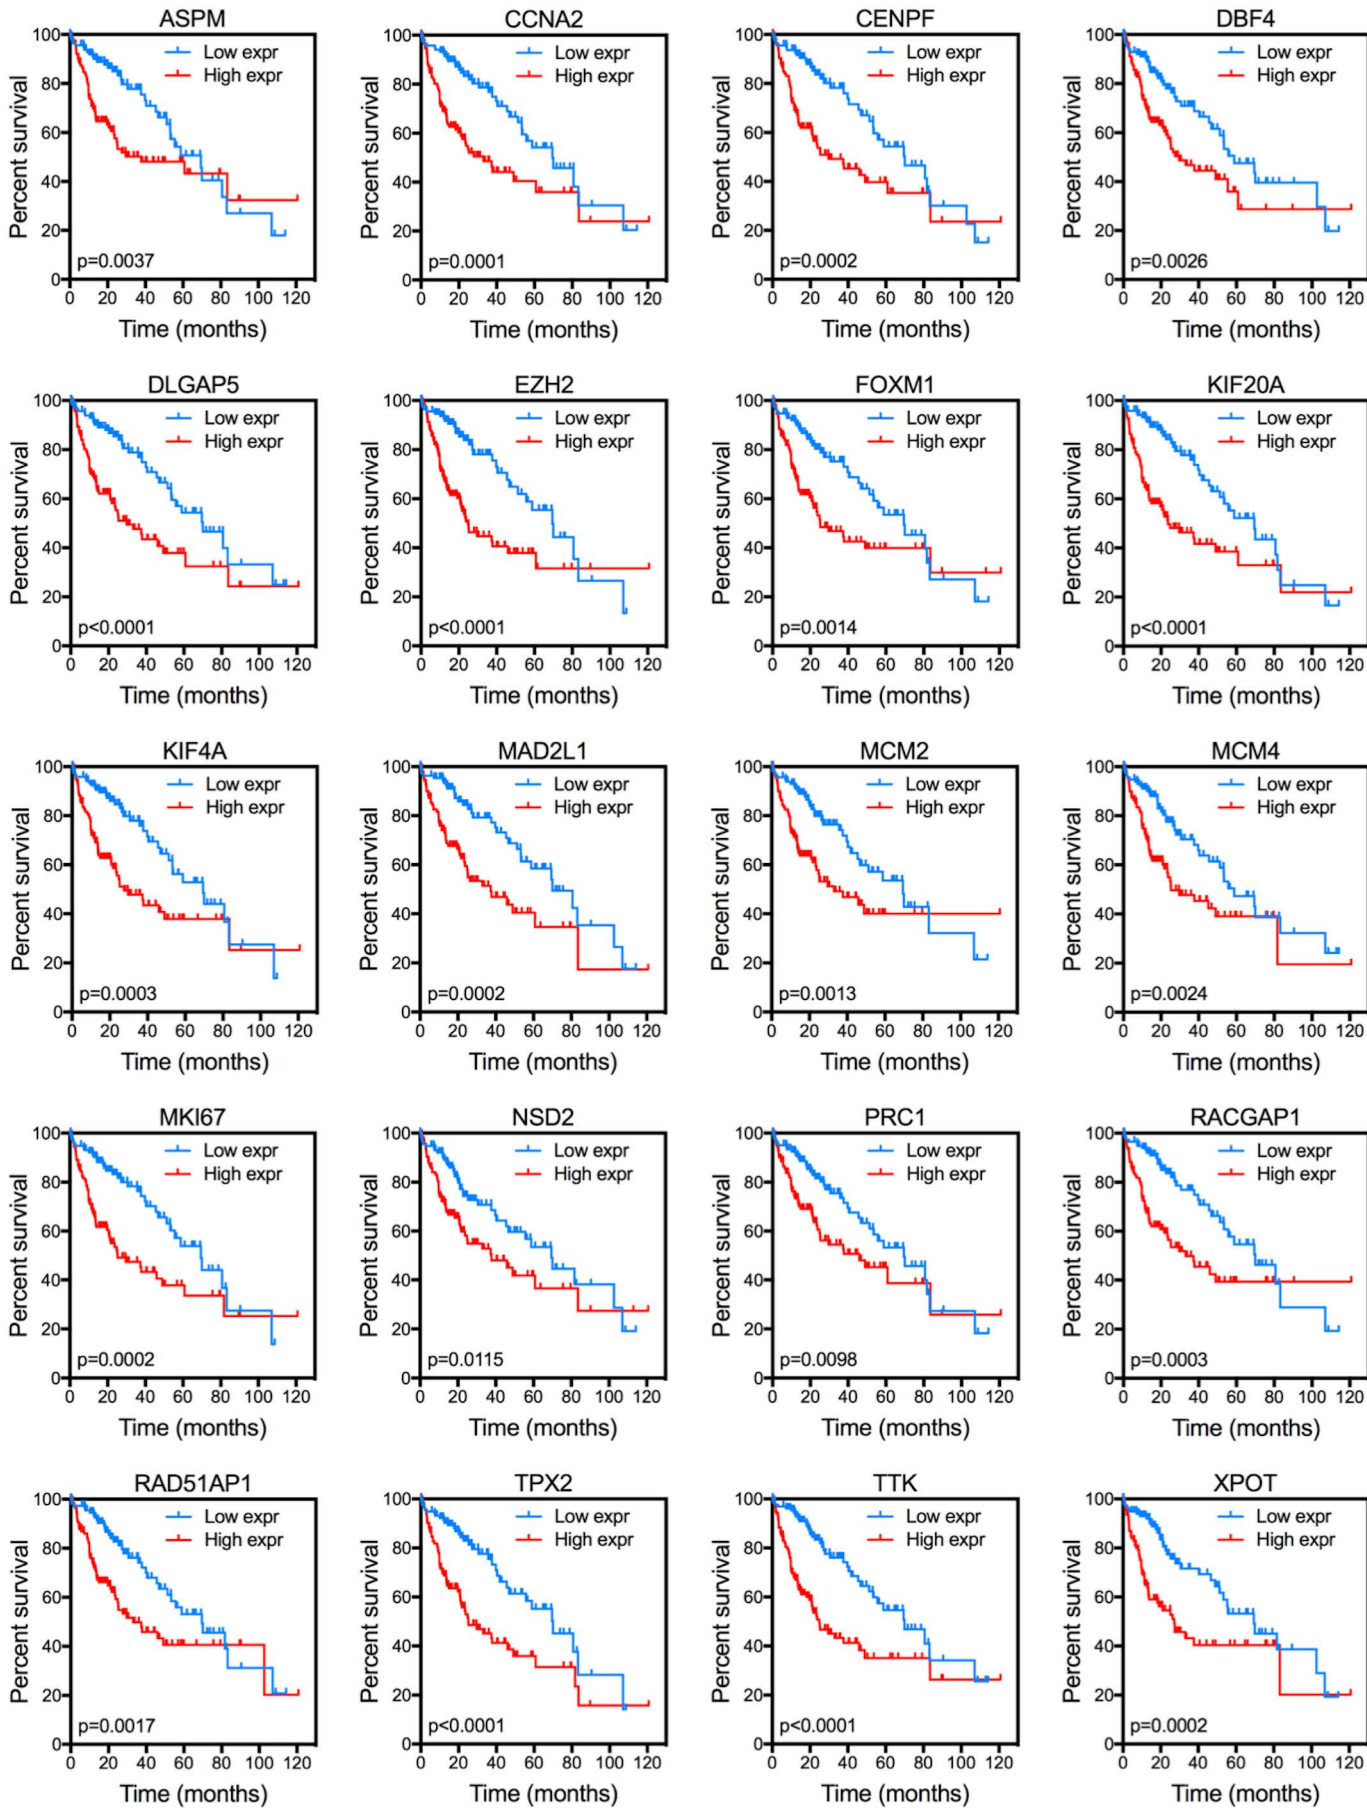

# Supplemental fig. 5

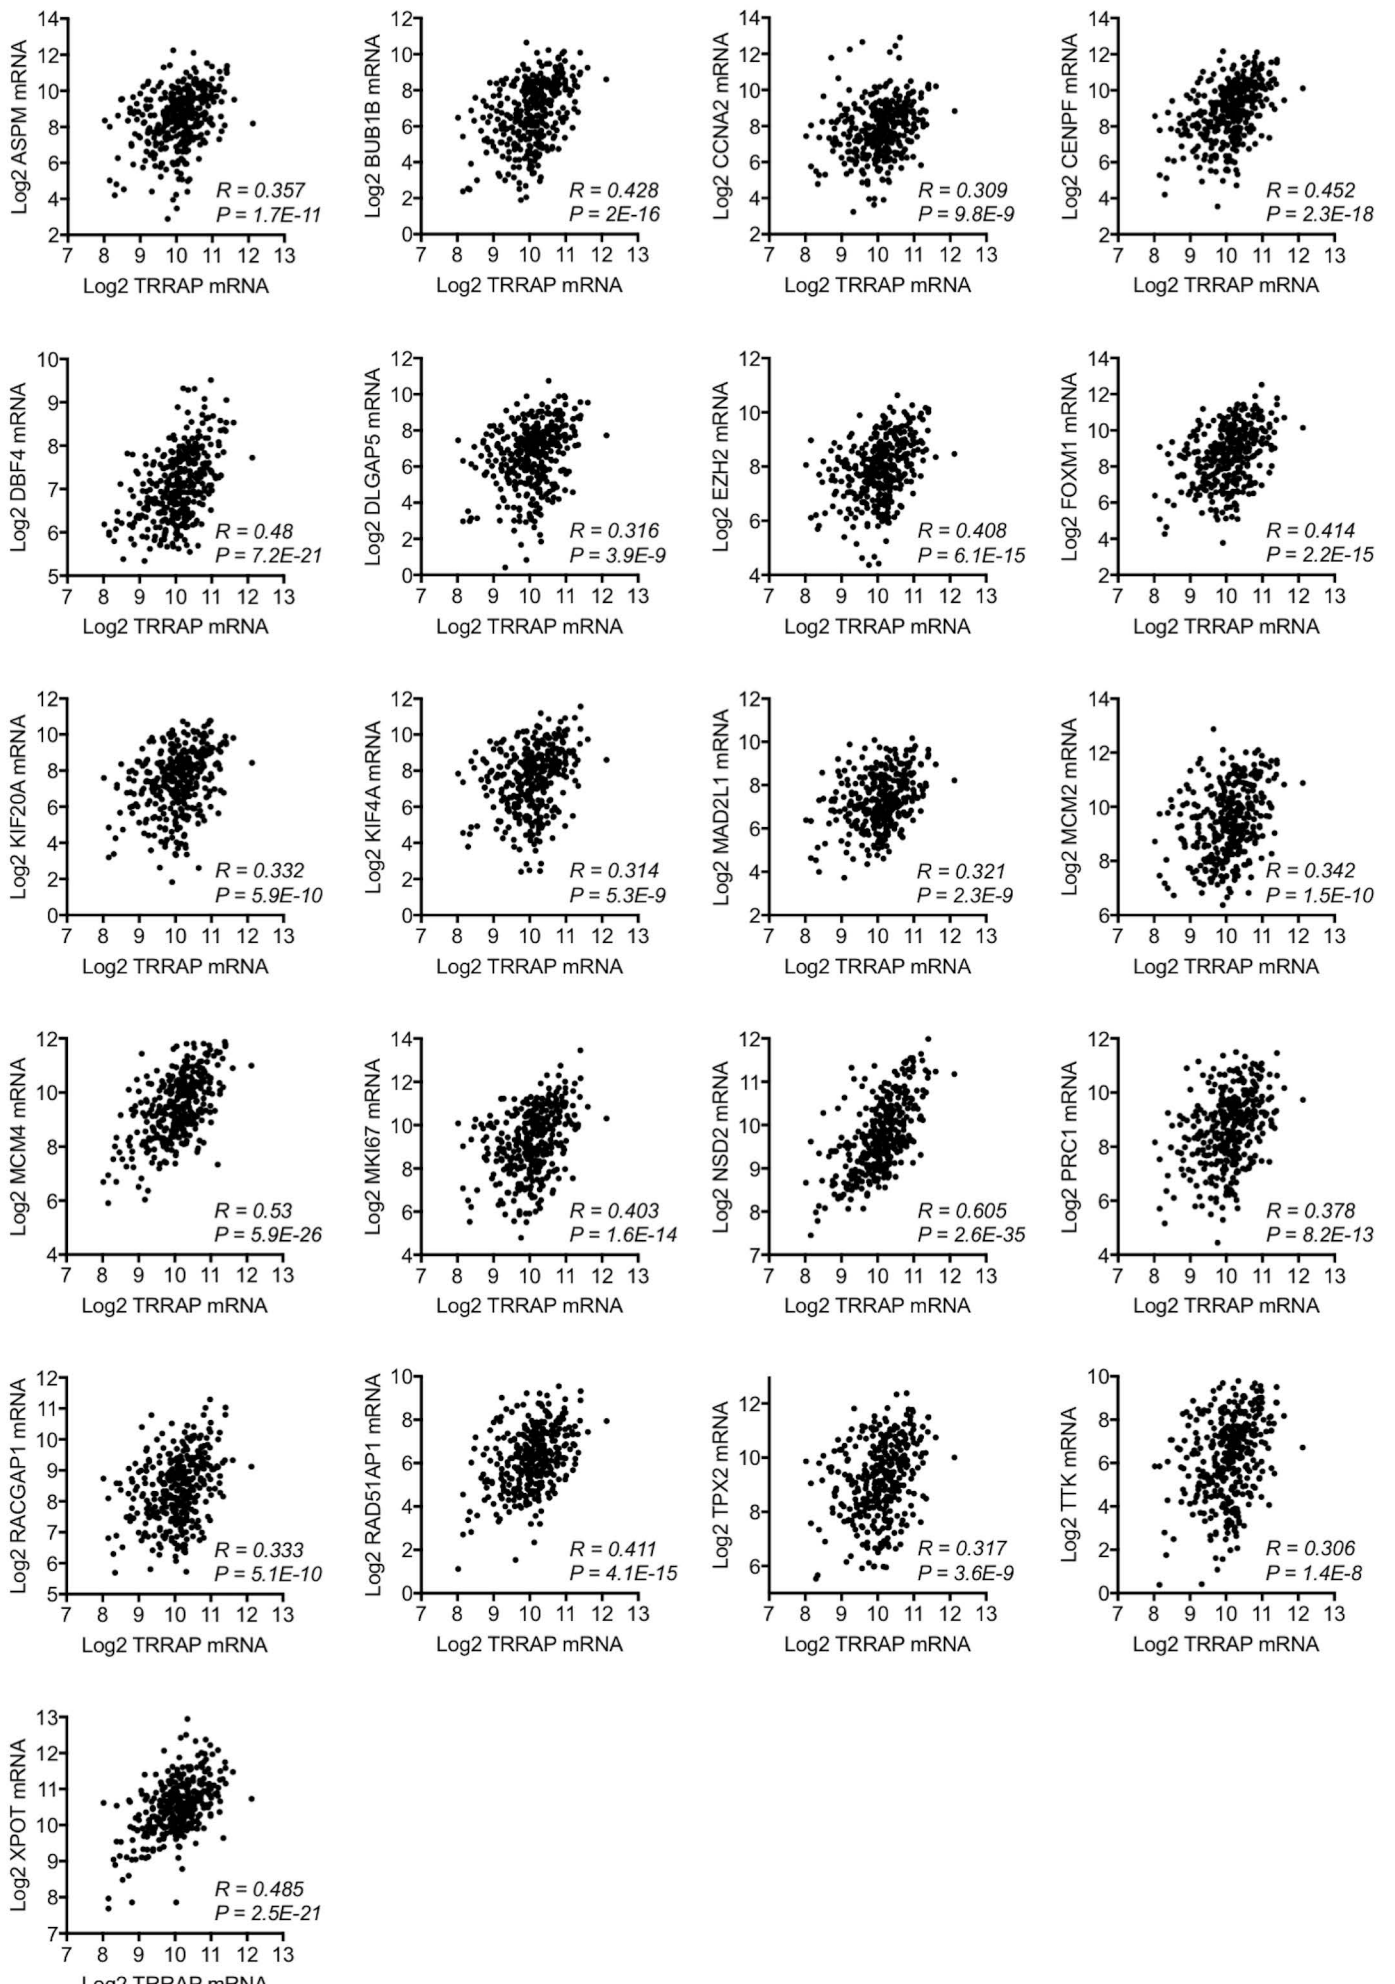

# Supplemental fig. 6

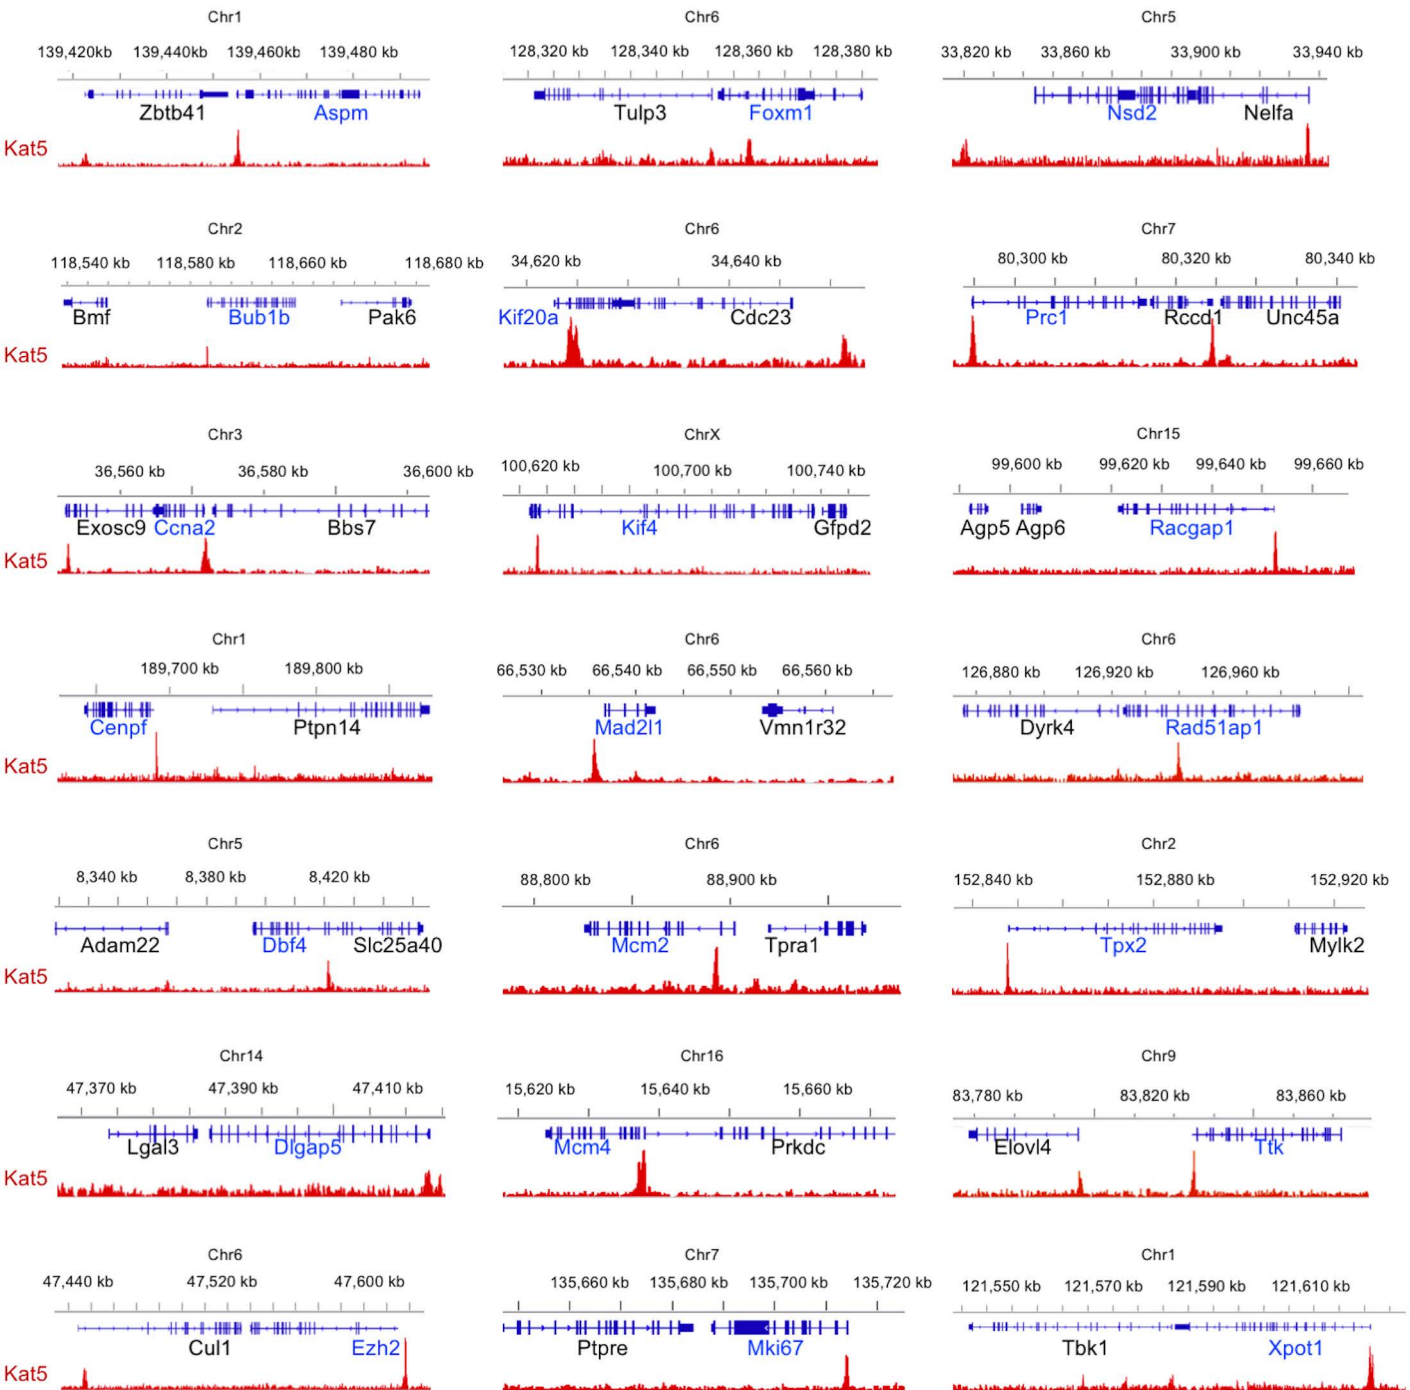

# Supplementary Fig. 7

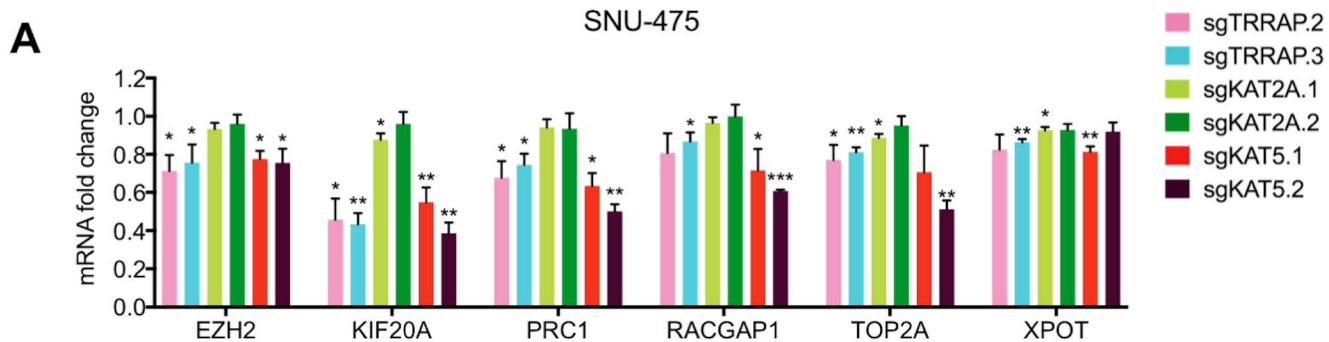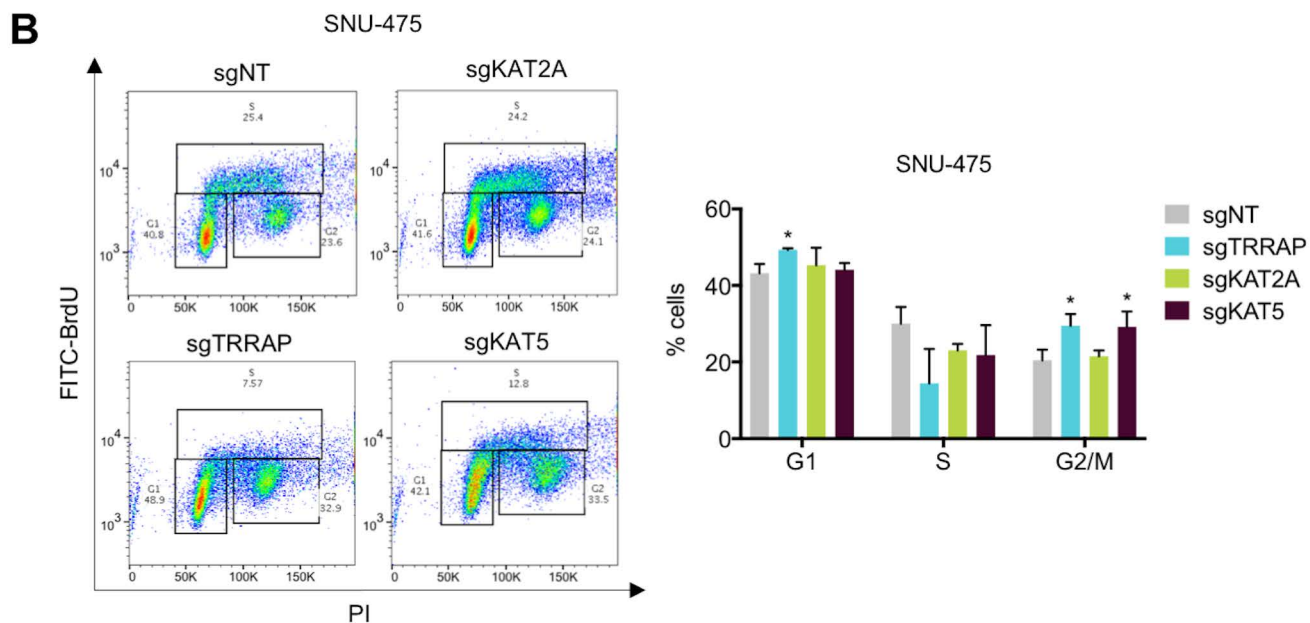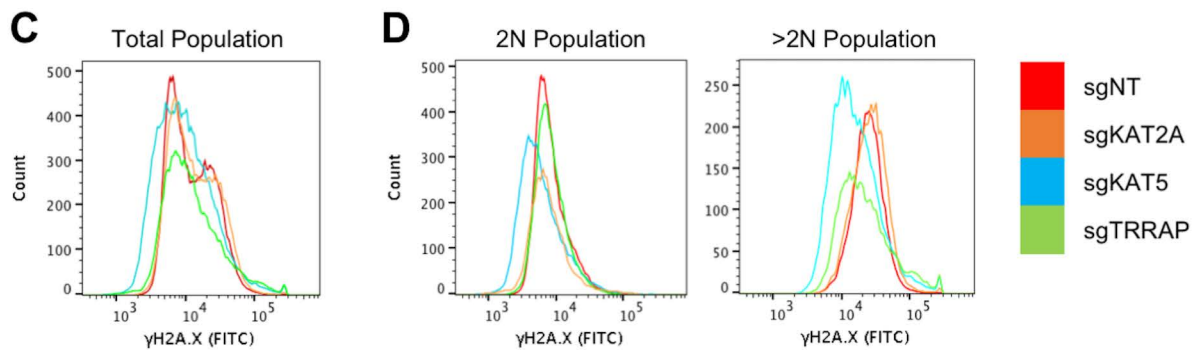

# Supplementary Fig. 8

**A**

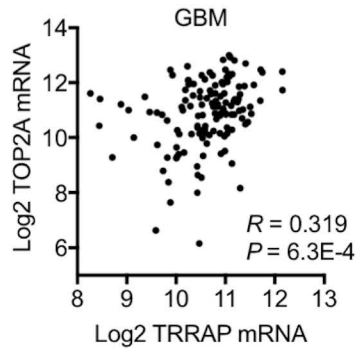

**B**

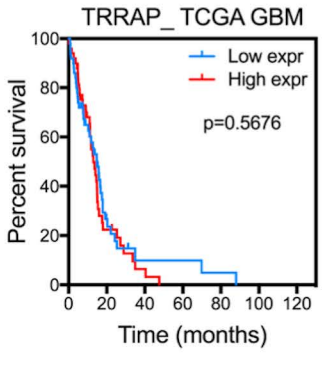



# Supplementary Fig. 9

## A

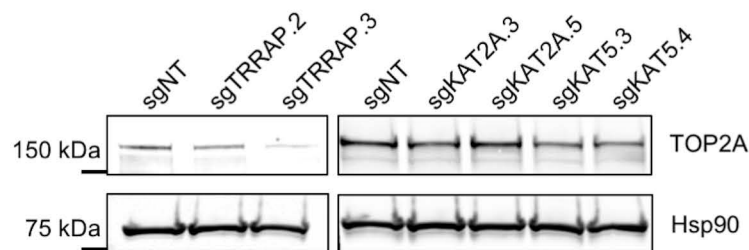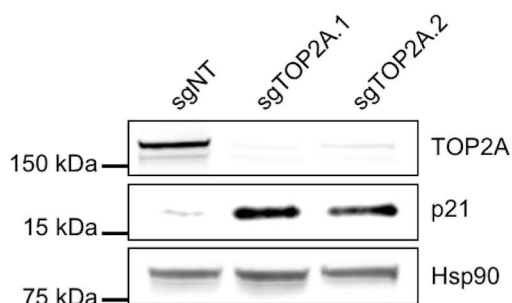

## B

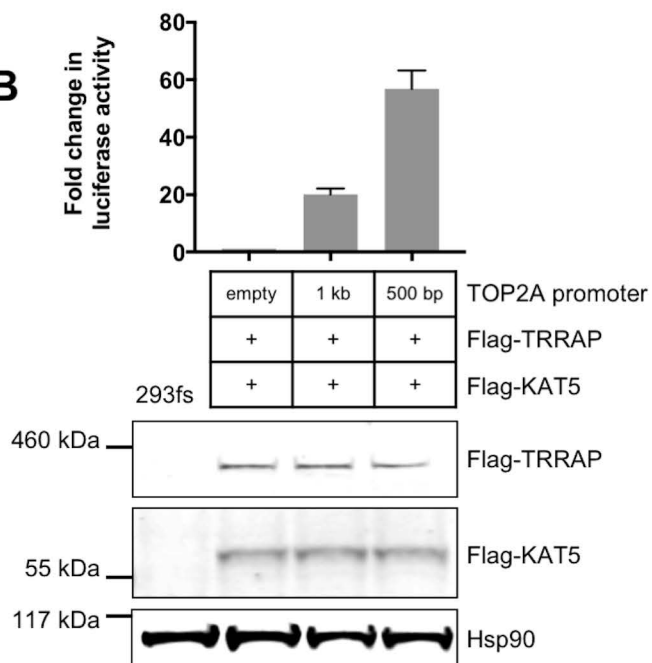

## C

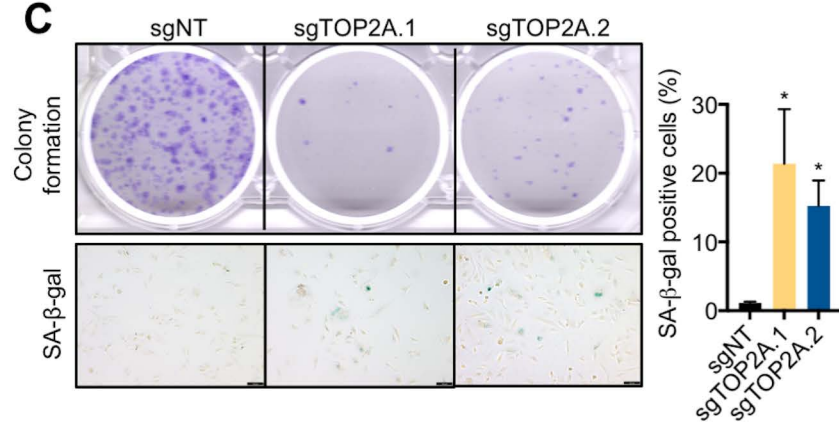

## D

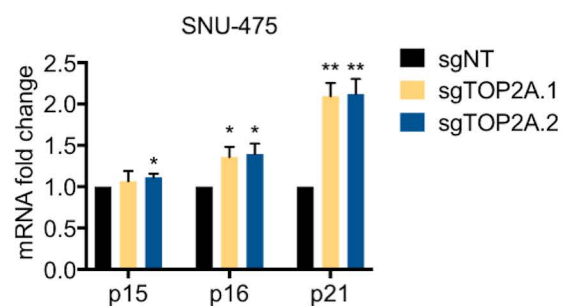

## E

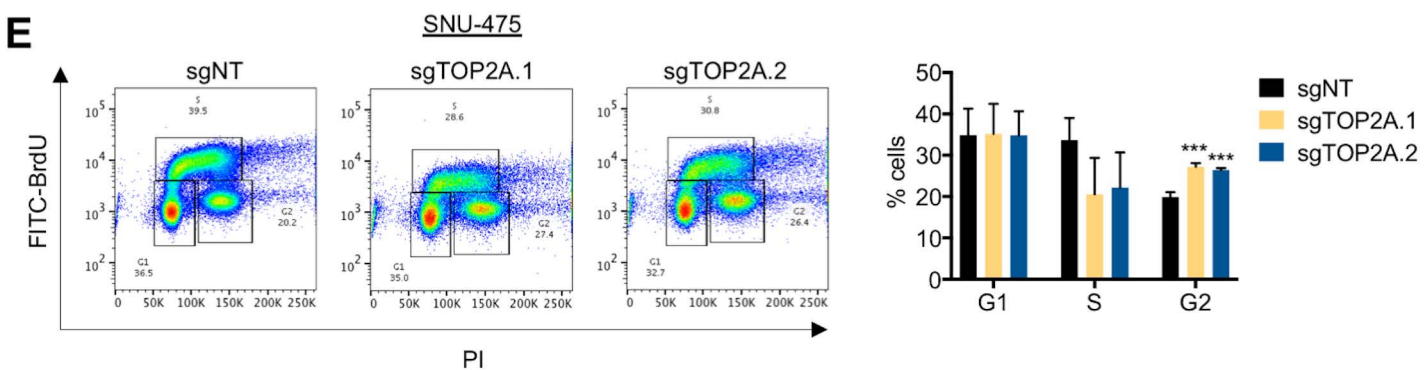

## F

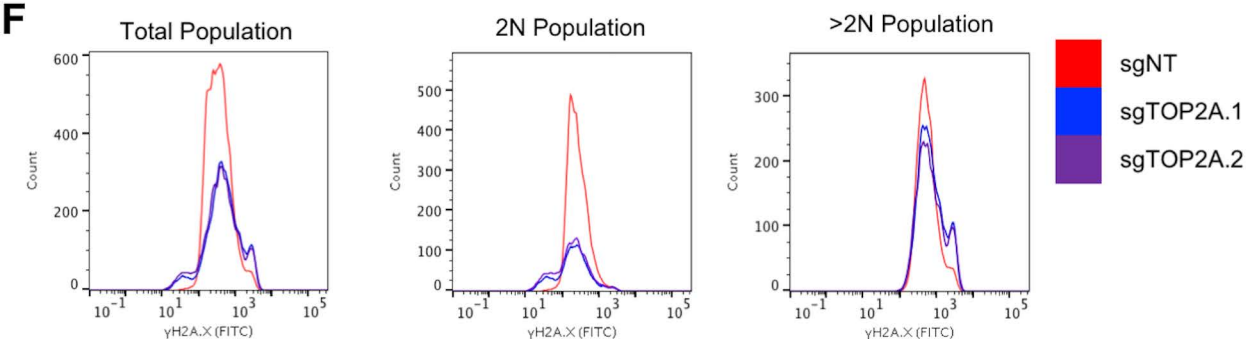

# Supplementary Fig. 10

**A**

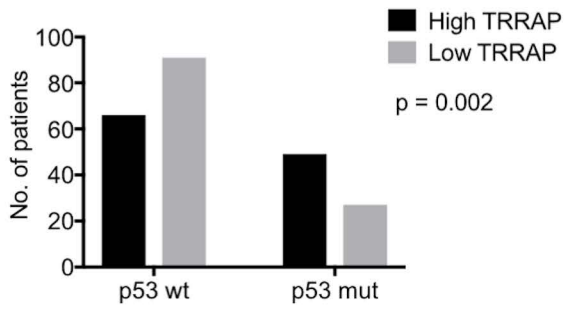

**Supplementary Table 1. sgRNA sequences used in this study.**

| sgRNA name | Sequence (5'-3')     |
|------------|----------------------|
| sgTRRAP.1  | ACTCCTGATACAAGAGATCG |
| sgTRRAP.2  | CTTGATCCGCCACTATACGA |
| sgTRRAP.3  | CCACTGGGGATCGTTCAGTG |
| sgKAT2A.1  | GCTGCTGGAAAAGTTCCGAG |
| sgKAT2A.2  | TCACCATGCCACCCTCAGAG |
| sgKAT5.1   | GATTGATGGACGTAAGAACA |
| sgKAT5.2   | ACCAGGCTGCCAGTCATGCG |
| sgp21      | GTCACCGAGACACCACTGGA |
| sgTOP2A.1  | TGTACGCTTATCCTGACTGA |
| sgTOP2A.2  | GATGCTGCTATCAGCCTGGT |

**Supplementary Table 2. Primers used for qRT-PCR in this study.**

| Primer name | Sequence (5'-3')        |
|-------------|-------------------------|
| p15-F       | AAGCTGAGCCCAGGTCTCCTA   |
| p15-R       | CCACCGTTGGCCGTAAACT     |
| p16-F       | CCCAACGCACCGAATAGTTA    |
| p16-R       | ACCAGCGTGTCCAGGAAG      |
| p21-F       | CAGCAGAGGAAGACCATGTG    |
| p21-R       | GAGGCACAAGGGTACAAGACA   |
| KAT2A-F     | CAGGGTGTGCTGAACTTTGTG   |
| KAT2A-R     | TCCAGTAGTTAAGGCAGAGCAA  |
| KAT5-F      | GGGAGATAATCGAGGGCTG     |
| KAT5-R      | TCCAGACGTTTGTGTAAGTCAAT |
| EZH2-F      | AATCAGAGTACATGCGACTGAGA |
| EZH2-R      | GCTGTATCCTTCGCTGTTTCC   |
| KIF20A-F    | GCCAACTTCATCCAACACCT    |
| KIF20A-R    | GTGGACAGCTCCTCCTCTTG    |
| PRC1-F      | ATCACCTTCGGGAAATATGGGA  |
| PRC1-R      | TCTTTCTGACAGACGGATATGCT |
| RACGAP1-F   | CTATGATGCTGAATGTGCGG    |
| RACGAP1-R   | AATCCTCAAAGTCCTTCGCC    |
| TOP2A-F     | ACCATTGCAGCCTGTAAATGA   |
| TOP2A-R     | GGGCGGAGCAAAATATGTTCC   |



|        |                        |
|--------|------------------------|
| XPOT-F | AGGGAGACGCTCATATCATGG  |
| XPOT-R | TTGGGCGGCTTTATTTTCGTAT |

**Supplementary Table 3. List of genes that are up-regulated in the absence of TRRAP and identified from our bioinformatics analyses.**

| Gene<br>Symbol | Entrez gene name                               | RNA-seq<br>sgTRRAP/sgNT |         | GSE14520<br>HCC/<br>non-tumor tissue |         | TCGA HCC co-<br>expressed with<br>TRRAP |         |
|----------------|------------------------------------------------|-------------------------|---------|--------------------------------------|---------|-----------------------------------------|---------|
|                |                                                | Fold<br>change          | P-value | Fold<br>change                       | P-value | Spearman's<br>coefficient               | P-value |
| BAAT           | bile acid-CoA:amino acid<br>N-acyltransferase  | 10.79                   | 4.0E-40 | 0.41                                 | 5.4E-22 | -0.309                                  | 9.7E-09 |
| ITIH1          | inter-alpha-trypsin<br>inhibitor heavy chain 1 | 2.05                    | 2.9E-03 | 0.41                                 | 1.1E-32 | -0.4                                    | 2.4E-14 |
| RDH16          | retinol dehydrogenase 16                       | 3.54                    | 4.9E-02 | 0.14                                 | 1.3E-73 | -0.301                                  | 2.5E-08 |

**Supplementary Table 4. TRRAP regulates a similar set of genes in HCC and GBM.**

| Gene symbol   | Spearman's Correlation | p-Value        |
|---------------|------------------------|----------------|
| <b>ASPM</b>   | <b>0.484</b>           | <b>2.6E-08</b> |
| <b>BUB1B</b>  | <b>0.315</b>           | <b>7.6E-04</b> |
| CCNA2         | 0.117                  | 2.8E-01        |
| <b>CENPF</b>  | <b>0.554</b>           | <b>5.2E-11</b> |
| DBF4          | 0.139                  | 1.9E-01        |
| DLGAP5        | 0.211                  | 3.3E-02        |
| <b>EZH2</b>   | <b>0.408</b>           | <b>5.7E-06</b> |
| <b>FOXM1</b>  | <b>0.437</b>           | <b>8.5E-07</b> |
| <b>KIF20A</b> | <b>0.324</b>           | <b>5.0E-04</b> |
| <b>KIF4A</b>  | <b>0.418</b>           | <b>2.9E-06</b> |
| MAD2L1        | -0.084                 | 4.5E-01        |
| <b>MCM2</b>   | <b>0.393</b>           | <b>1.3E-05</b> |
| <b>MCM4</b>   | <b>0.544</b>           | <b>1.4E-10</b> |
| <b>MKI67</b>  | <b>0.590</b>           | <b>1.3E-12</b> |
| <b>NSD2</b>   | <b>0.569</b>           | <b>1.2E-11</b> |
| <b>PRC1</b>   | <b>0.347</b>           | <b>1.6E-04</b> |
| RACGAP1       | 0.136                  | 2.0E-01        |
| RAD51AP1      | -0.036                 | 7.7E-01        |
| <b>TOP2A</b>  | <b>0.319</b>           | <b>6.3E-04</b> |

|             |              |                |
|-------------|--------------|----------------|
| <b>TPX2</b> | <b>0.375</b> | <b>3.8E-05</b> |
| TTK         | 0.177        | 8.2E-02        |
| XPOT        | 0.205        | 3.9E-02        |



**Supplementary Table 5. Primers used for cloning the TOP2A promoter.**

| Primer name   | Sequence (5'-3')               |
|---------------|--------------------------------|
| TOP2A 500bp F | CTTACGCGTGCTAGCCCTCTCTAGTCCCGC |
| TOP2A 500bp R | TATATACCCGAATTCTTCACTACTAGCACC |
| TOP2A 1kb F   | CTTACGCGTGCTAGCCATTCCCCTCGCTAA |
| TOP2A 1kb R   | TATATACCCGAATTCCTCAGGAAGGGGGCG |
